# Supplementary material for: Effects of droplet size and surfactants on anchoring in liquid crystal nanodroplets
Source: Royal Society of Chemistry journal article supplement (doi:10.1039/c9sm00291j), 2019-01-01
Supplement: c9sm00291j1.pdf [file c9sm00291j1.pdf]

*Supplementary Information for*

**Effects of Droplet Size and Surfactants on Anchoring in Liquid Crystal Nanodroplets**

Zeynep Sumer and Alberto Striolo\*

Department of Chemical Engineering, University College London  
London WC1E 7JE, United Kingdom

\*Corresponding author: [a.striolo@ucl.ac.uk](mailto:a.striolo@ucl.ac.uk)

In Figure S1 and S2, simulations were conducted for  $3 \times 10^6$  steps and configurations were recorded for last  $10^6$  steps (last 0.149  $\mu$ s). Within these  $10^6$  steps of simulation production, data are collected in every  $10^4$  steps and averages of 100 frames are used for quantitative analysis. Last frames of each simulations are used for visuals.

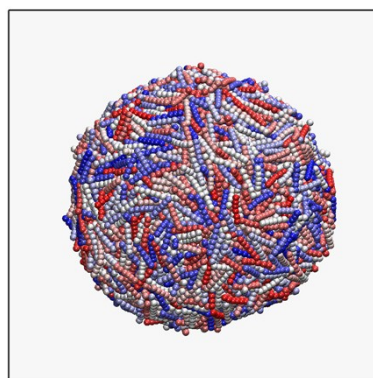

**Figure S1.** Snapshot of the simulation conducted at 1.0  $k_B T$  where repulsion coefficient between water/LC beads was 50  $k_B T/r_c$ . Orientational order (S) was calculated as  $0.01 \pm 0.01$ .

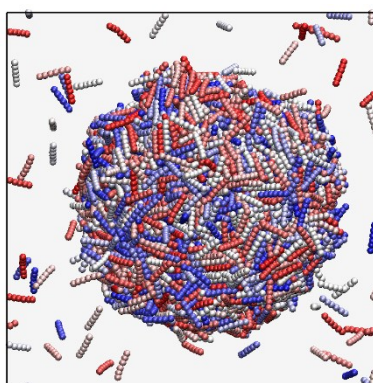

**Figure S2.** Snapshot of the simulation conducted at 0.62  $k_B T$  where repulsion coefficient between water/LC beads was 30  $k_B T/r_c$ .

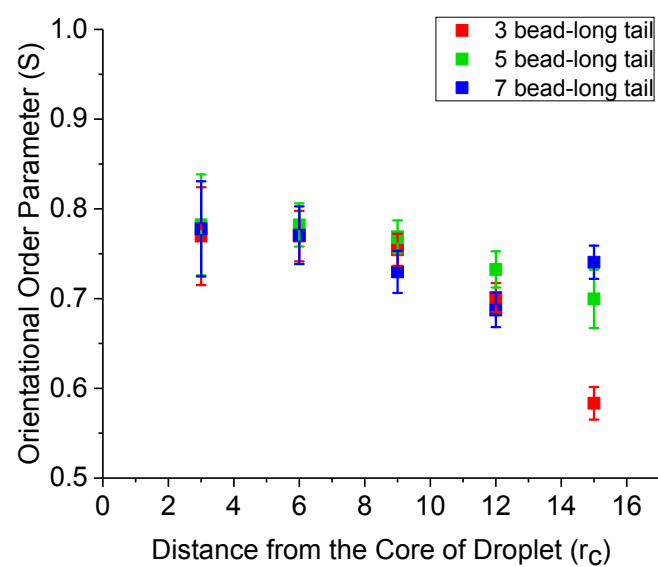

**Figure S3.** Orientational order of LC molecules for the droplets shown in Figure 3, shown as a function of the distance from the droplet core, within intervals of width  $3 r_c$ .
